# Supplementary material
Source: PubMed Central journal article supplement (PMC4246032)
Supplement: NIHMS589202-supplement-1.pdf [file NIHMS589202-supplement-1.pdf]

Supplementary Table 1. Demographic characteristics of FTO genotype groups (*rs1421085* SNP) in BMI, impulsivity, and dietary analyses in the BLSA

|                                 | BMI analysis      |                   | P value | Impulsivity analysis |                   | P value | Dietary analysis  |                   | P value |
|---------------------------------|-------------------|-------------------|---------|----------------------|-------------------|---------|-------------------|-------------------|---------|
|                                 | FTO+<br>(N = 471) | FTO-<br>(N = 226) |         | FTO +<br>(N= 468)    | FTO -<br>(N= 224) |         | FTO +<br>(N= 373) | FTO -<br>(N= 185) |         |
| Age at baseline, years          | 45.8 (17.3)       | 45.6 (15.7)       | 0.848   | 55.3 (16.2)          | 54.8 (15.1)       | 0.751   | 52.8 (17.1)       | 52.2 (16.1)       | 0.710   |
| Female, n(%)                    | 216 (45.8)        | 109 (48.2)        | 0.557   | 215 (45.9)           | 109 (48.7)        | 0.502   | 173 (46.4)        | 85 (45.9)         | 0.923   |
| Education, years                | 16.6 (2.3)        | 16.7 (2.1)        | 0.969   | 16.7 (2.3)           | 16.7 (2.1)        | 0.991   | 16.7 (2.3)        | 16.8 (2.0)        | 0.544   |
| Mean follow-up visits           | 10.3 (6.0)        | 10.8 (6.1)        | 0.338   | 4.1 (2.6)            | 4.5 (2.6)         | 0.072   | 3.0 (2.0)         | 3.1 (1.9)         | 0.879   |
| Mean follow-up years, mean (SD) | 22.8 (12.1)       | 23.8 (11.8)       | 0.278   | 9.7 (5.9)            | 10.7 (5.7)        | 0.040   | 11.1 (11.1)       | 12.3 (11.6)       | 0.207   |

Supplementary Table 2. Demographic characteristics of *FTO* genotype groups (*rs1421085* SNP) in the <sup>15</sup>[O] water PET study.

|                                                            | Whole sample<br>(N=69) | FTO + (N= 41) | FTO - (N= 28) | P value |
|------------------------------------------------------------|------------------------|---------------|---------------|---------|
| Sex (female), N (%)                                        | 26 (37.7)              | 14 (34.2)     | 12 (42.9)     | 0.46    |
| Age at first PET scan, years, mean(SD)                     | 69.0 (7.3)             | 69.5 (7.2)    | 68.3 (7.5)    | 0.50    |
| Hypertension, N(%)                                         | 35 (50.7)              | 21 (51.2)     | 13 (50)       | 0.92    |
| Diabetes, N(%)                                             | 8 (11.6)               | 3 (7.3)       | 5 (17.9)      | 0.18    |
| Current/former smoker, N(%)                                | 44 (63.7)              | 28 (68.3)     | 16 (57.1)     | 0.55    |
| Hypercholesterolemia, N (%)                                | 10 (14.5)              | 5 (12.2)      | 5 (17.9)      | 0.51    |
| History of angina, N(%)                                    | 16 (23.2)              | 8 (19.5)      | 8 (28.6)      | 0.38    |
| History of MI                                              | 9 (13.4)               | 5 (12.2)      | 4 (14.3)      | 0.80    |
| History of TIA                                             | 4 (5.8)                | 3 (7.3)       | 1 (3.6)       | 0.51    |
| Mean BMI during PET scans, kg/m <sup>2</sup> ,<br>mean(SD) | 27.4 (3.8)             | 27.3 (3.6)    | 27.5 (4.2)    | 0.84    |
| BMI at age 50, kg/m <sup>2</sup> , mean(SD)                | 25.2 (3.5)             | 24.5 (2.8)    | 26.1 (4.1)    | 0.066   |

Supplementary Table 3. Local maxima of regions showing greater longitudinal decreases and increases in rCBF in the *FTO+* (*rs1421085* SNP) group

| Region                          | Side | Coordinates |     |     | T value | P value | Number of voxels |
|---------------------------------|------|-------------|-----|-----|---------|---------|------------------|
|                                 |      | x           | y   | z   |         |         |                  |
| Decreases in rCBF               |      |             |     |     |         |         |                  |
| Anterior cingulate gyrus (32)   | L    | -12         | 46  | 14  | 3.54    | <0.001  | 116              |
| Medial orbitofrontal gyrus (11) | R    | 10          | 34  | -12 | 3.32    | <0.001  | 260              |
| Anterior cingulate gyrus (24)   | R    | 2           | 30  | 4   | 3.28    | 0.001   |                  |
| Inferior parietal gyrus(40)     | R    | 42          | -60 | 42  | 3.12    | 0.001   | 56               |
| Superior temporal gyrus (21)    | R    | 64          | -16 | 2   | 3.58    | <0.001  | 96               |
| Parahippocampal gyrus(35)       | L    | -22         | -24 | -16 | 3.21    | 0.001   | 117              |
| Occipital/peristriate (19)      | R    | 28          | -84 | 24  | 3.38    | 0.001   | 87               |
| Cerebellum                      | L    | -34         | -94 | -20 | 4.59    | <0.001  | 375              |
| Cerebellum                      | R    | 8           | -44 | -24 | 3.22    | 0.001   | 108              |
| Increases in rCBF               |      |             |     |     |         |         |                  |
| Inferior frontal gyrus (45)     | L    | -32         | 36  | 2   | 3.30    | 0.001   | 69               |
| Middle temporal gyrus (21)      | L    | -58         | -50 | 0   | 4.07    | <0.001  | 331              |
| Cuneus (18)                     | R    | 10          | -72 | 24  | 3.36    | <0.001  | 87               |
| Brainstem                       | R    | 6           | -24 | -14 | 3.26    | 0.001   | 81               |

Supplementary Table 4. Longitudinal change of (A) impulsivity-related traits (N=692) and (B) food intake (N=558) for number of obesity-related risk C alleles of *FTO* (*rs1421085*)

(A)

|                         | TT<br>slope (SE) <sup>†</sup> | TC<br>slope (SE) | CC<br>slope (SE) | Differences in<br>slopes | p-value | Effect size |
|-------------------------|-------------------------------|------------------|------------------|--------------------------|---------|-------------|
| Impulsivity (N5)*       | -0.07 (0.07)                  | -0.06 (0.07)     | -0.05 (0.08)     | 0.007 (0.03)             | 0.809   | 0.23        |
| Excitement-seeking (E5) | -0.19 (0.07)                  | -0.13 (0.06)     | -0.07 (0.07)     | 0.06 (0.03)              | 0.027   | 2.0         |
| Self-Discipline (C5)    | -0.09 (0.08)                  | -0.10 (0.07)     | -0.11 (0.08)     | -0.01 (0.03)             | 0.740   | 0.33        |
| Deliberation (C6)       | 0.08 (0.07)                   | 0.07 (0.07)      | 0.06 (0.07)      | -0.007 (0.03)            | 0.808   | 0.23        |

(B)

|                         | TT<br>slope (SE) <sup>†</sup> | TC<br>slope (SE) | CC<br>slope (SE) | Differences in<br>slopes | p-value | Effect size |
|-------------------------|-------------------------------|------------------|------------------|--------------------------|---------|-------------|
| Fat intake (%)§         | -0.14 (0.04)                  | -0.08 (0.03)     | -0.02 (0.04)     | 0.06 (0.03)              | 0.016   | 2.0         |
| Carbohydrate intake (%) | 0.18 (0.05)                   | 0.12 (0.04)      | 0.06 (0.05)      | -0.06 (0.03)             | 0.06    | 2.0         |
| Protein intake (%)      | -0.002 (0.01)                 | -0.004 (0.01)    | -0.006 (0.02)    | -0.002 (0.01)            | 0.848   | 0.2         |

\* All impulsivity-related traits were standardized T score. All models were adjusted for baseline age (centered at 60), sex, baseline age×time, sex×time, years of education (centered at 16 years)

<sup>†</sup> SE: standard error

§ Macronutrient intakes were calculated as the percentages of energy derived from macronutrient intakes. All models were adjusted for baseline age (centered at 60), sex, baseline age×time, sex×time and year of baseline visit (centered at year 1980)

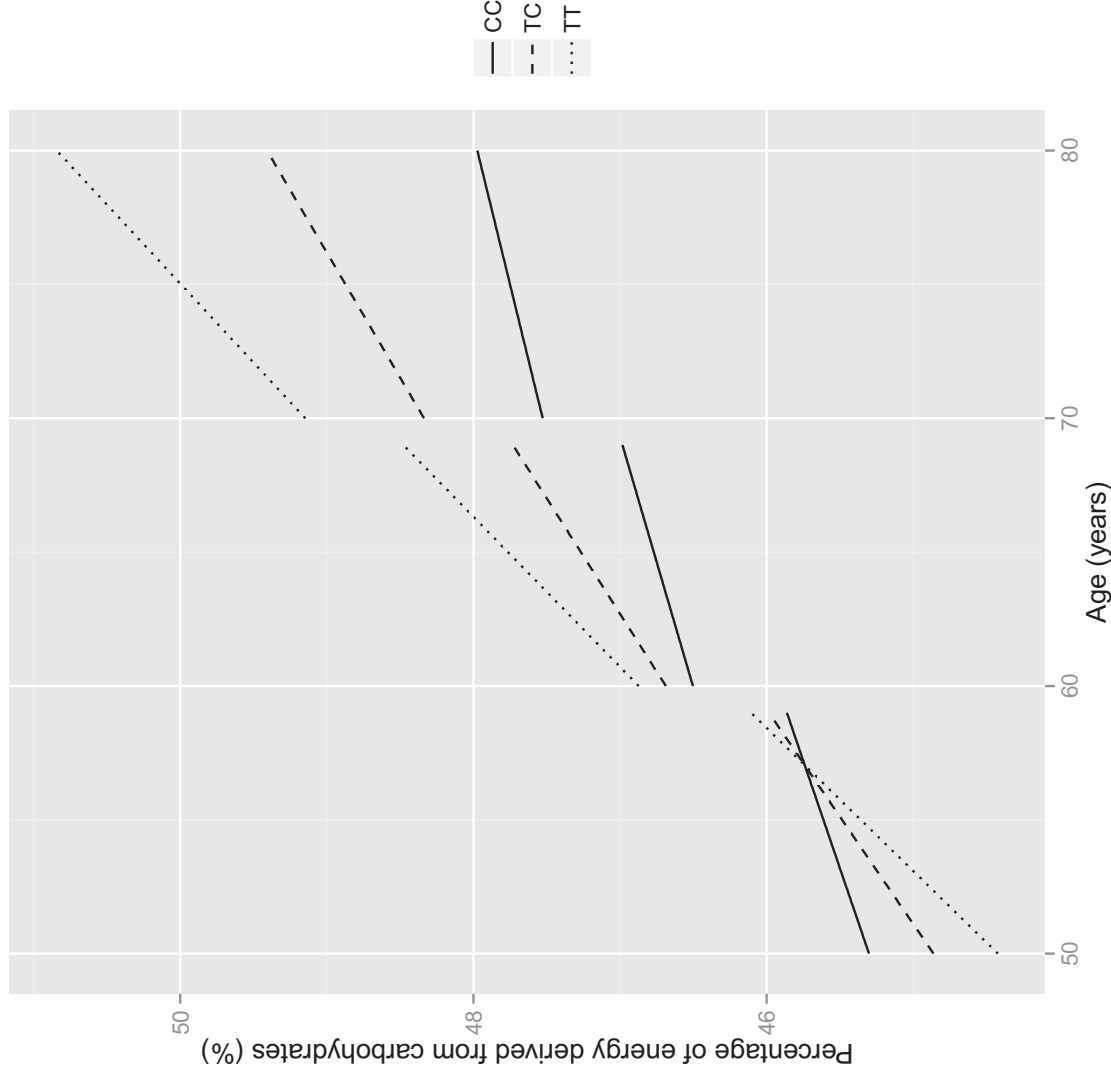

Supplementary Fig. 1

The effect of *FTO* genotype (rs1421085 single nucleotide polymorphism; obesity-risk allele-C) on carbohydrate intake during aging from the mixed-effects models. The trajectories were presented at 3 different baseline age periods: 50-60, 60-70, 70-80 years of age. In general, carbohydrate intake increased as age increased. The presence of obesity risk alleles was associated with less increase in carbohydrate intake over time.

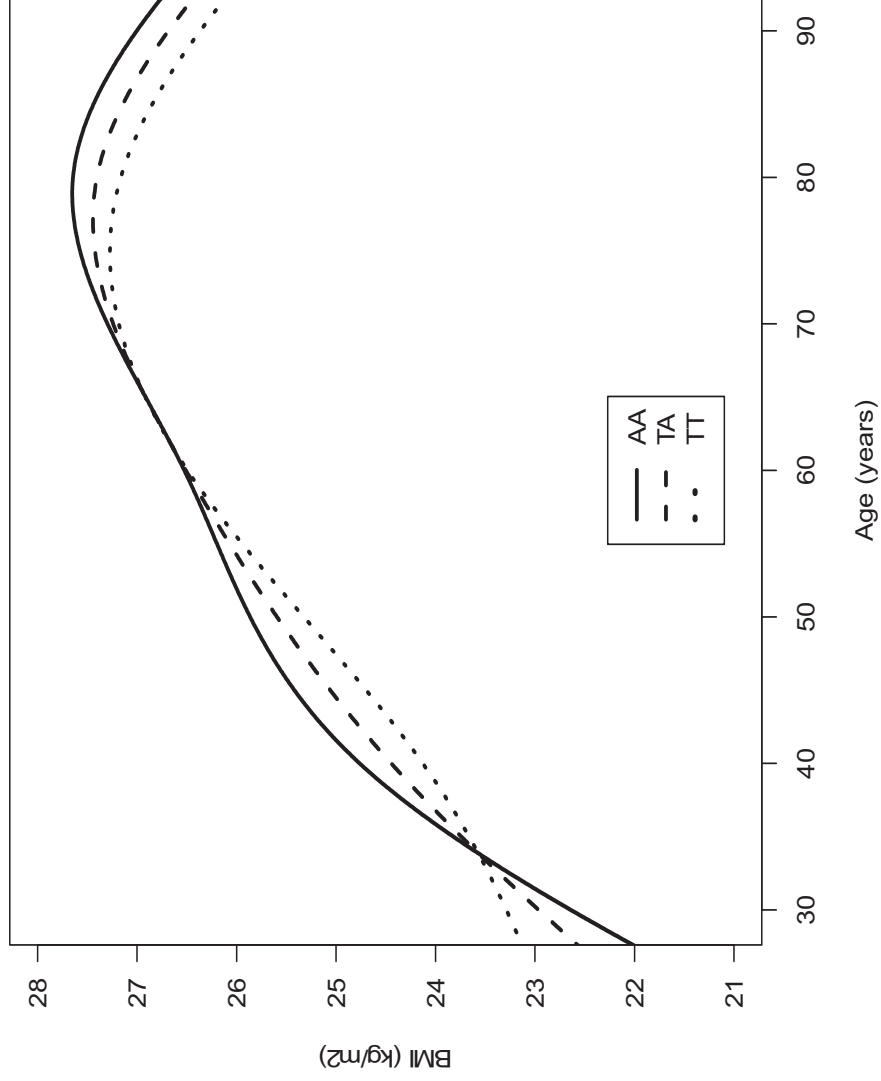

Supplementary Fig. 2

The effect of *FTO* genotype (*rs9939609* single nucleotide polymorphism; obesity-risk allele-A) on age- and sex-adjusted trajectories of body mass index (BMI) during aging. Trajectories of BMI over time were significantly different between obesity risk allele non-carriers, heterozygous and homozygous individuals (likelihood ratio test:  $\chi^2=13.4$ ,  $df=4$ ,  $p=0.0096$ )

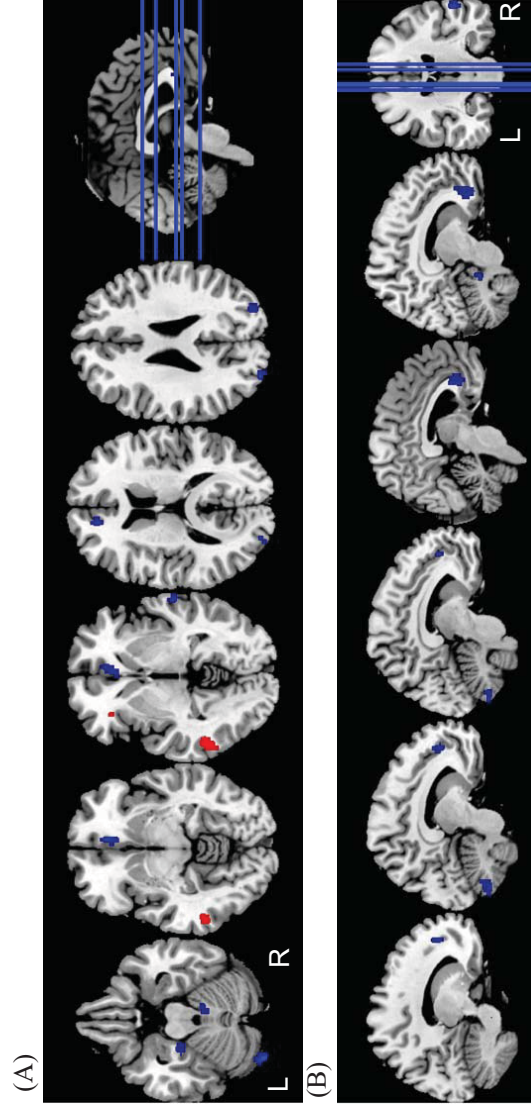

Supplementary Fig. 3

Differences in longitudinal changes in regional resting state cerebral blood flow (rCBF) between obesity risk allele carriers (*FTO*+) and non-carriers (*FTO*-) (*rs9939609*). Blue areas indicate brain regions that show significantly greater longitudinal decreases in rCBF in the *FTO*+ group; red areas indicate brain regions that show greater longitudinal increases in rCBF in the *FTO*+ group. (A) axial view (B) sagittal view.

Supplementary Table 5. Local maxima of regions showing greater longitudinal decreases and increases in rCBF in individuals with *FTO+* gene (*rs9939609*)

| Region                          | Side | Coordinates |     |     | T value | P value | Number of voxels |
|---------------------------------|------|-------------|-----|-----|---------|---------|------------------|
|                                 |      | x           | y   | z   |         |         |                  |
| Decreases in rCBF               |      |             |     |     |         |         |                  |
| Anterior cingulate gyrus (32)   | L    | -12         | 46  | 16  | 3.54    | 0.001   | 69               |
| Medial orbitofrontal gyrus (11) | R    | 8           | 34  | -10 | 3.30    | 0.001   | 223              |
| Anterior cingulate gyrus (24)   | R    | 4           | 30  | 0   | 3.21    | 0.001   |                  |
| Superior temporal gyrus (39)    | R    | 44          | -53 | 30  | 3.16    | 0.001   | 55               |
| Superior temporal gyrus (21)    | R    | 64          | -16 | 2   | 3.46    | <0.001  | 77               |
| Parahippocampal gyrus(35)       | L    | -22         | -24 | -18 | 3.20    | 0.001   | 117              |
| Occipital/peristriate (19)      | R    | 28          | -84 | 24  | 3.07    | 0.001   | 55               |
| Cerebellum                      | L    | -32         | -96 | -18 | 4.71    | <0.001  | 304              |
| Cerebellum                      | R    | 8           | -44 | -22 | 2.93    | 0.001   | 53               |
| Increases in rCBF               |      |             |     |     |         |         |                  |
| Middle frontal gyrus (10)       | L    | -30         | 46  | 4   | 3.21    | 0.001   | 132              |
| Inferior frontal gyrus (45)     | L    | -32         | 36  | 2   | 3.14    | 0.001   |                  |
| Middle temporal gyrus (21)      | L    | -56         | -46 | 2   | 3.45    | <0.001  | 184              |



Supplementary Table 6. Longitudinal change of (A) impulsivity-related traits (N=692) and (B) food intake (N=558) for number of obesity-related risk A alleles of *FTO* (*rs9939609*)

|                         | TT<br>slope (SE) <sup>†</sup> | TA<br>slope (SE) | AA<br>slope (SE) | Differences in<br>slopes | p-value | Effect size |
|-------------------------|-------------------------------|------------------|------------------|--------------------------|---------|-------------|
| Impulsivity (N5)*       | -0.06 (0.07)                  | -0.06 (0.07)     | -0.07 (0.08)     | -0.002 (0.03)            | 0.950   | 0.07        |
| Excitement-seeking (E5) | -0.18 (0.07)                  | -0.13 (0.06)     | -0.08 (0.07)     | 0.05 (0.03)              | 0.073   | 1.67        |
| Self-Discipline (C5)    | -0.08 (0.08)                  | -0.11 (0.07)     | -0.13 (0.08)     | -0.02 (0.03)             | 0.471   | 0.67        |
| Deliberation (C6)       | 0.07 (0.07)                   | 0.07 (0.07)      | 0.07 (0.07)      | -0.0001 (0.03)           | 0.997   | 0.003       |

(B)

|                         | TT<br>slope (SE) <sup>†</sup> | TA<br>slope (SE) | AA<br>slope (SE) | Differences in<br>slopes | p-value | Effect size |
|-------------------------|-------------------------------|------------------|------------------|--------------------------|---------|-------------|
| Fat intake (%)§         | -0.14 (0.04)                  | -0.08 (0.03)     | -0.01 (0.04)     | 0.07 (0.03)              | 0.013   | 2.3         |
| Carbohydrate intake (%) | 0.19 (0.05)                   | 0.11 (0.04)      | 0.04 (0.05)      | -0.07 (0.03)             | 0.03    | 2.3         |
| Protein intake (%)      | -0.006 (0.02)                 | -0.003 (0.01)    | 0.0005 (0.02)    | 0.003 (0.01)             | 0.777   | 0.3         |

\* All impulsivity-related traits were standardized T score. All models were adjusted for baseline age (centered at 60), sex, baseline age×time, sex×time, years of education (centered at 16 years)

† SE: standard error

§ Macronutrient intakes were calculated as the percentages of energy derived from macronutrient intakes. All models were adjusted for baseline age (centered at 60), sex, baseline age×time, sex×time and year of baseline visit (centered at year 1980)
